# Supplementary material
Source: publisher site journal article supplement (https://www.dovepress.com/article/292472)
Supplement: Supplementary file 1 [file get_supplementary_file.php]

**
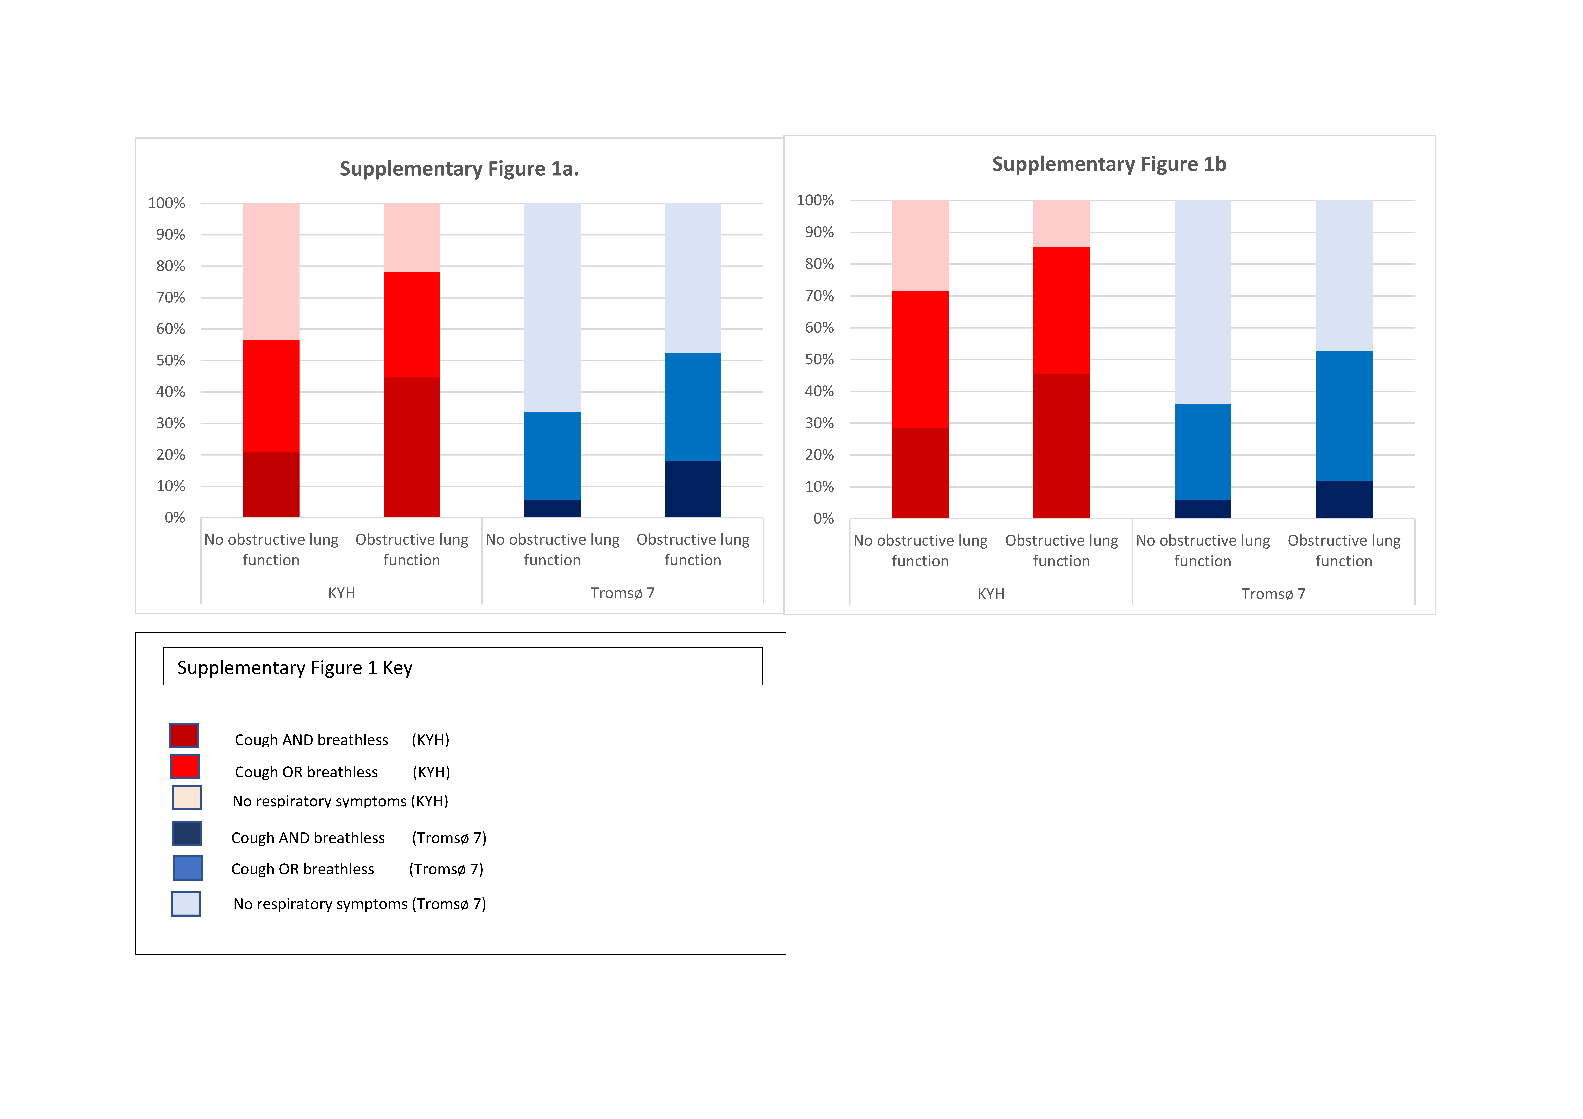
**

**Supplementary Figures 1a and 1b: Study-specific prevalence of respiratory symptoms by obstructive lung function in men and women**

Supplementary Figure 1a. Prevalence of respiratory symptoms by obstructive lung function and study in men

Supplementary Figure 1b. Prevalence of respiratory symptoms by obstructive lung function and study in women

**
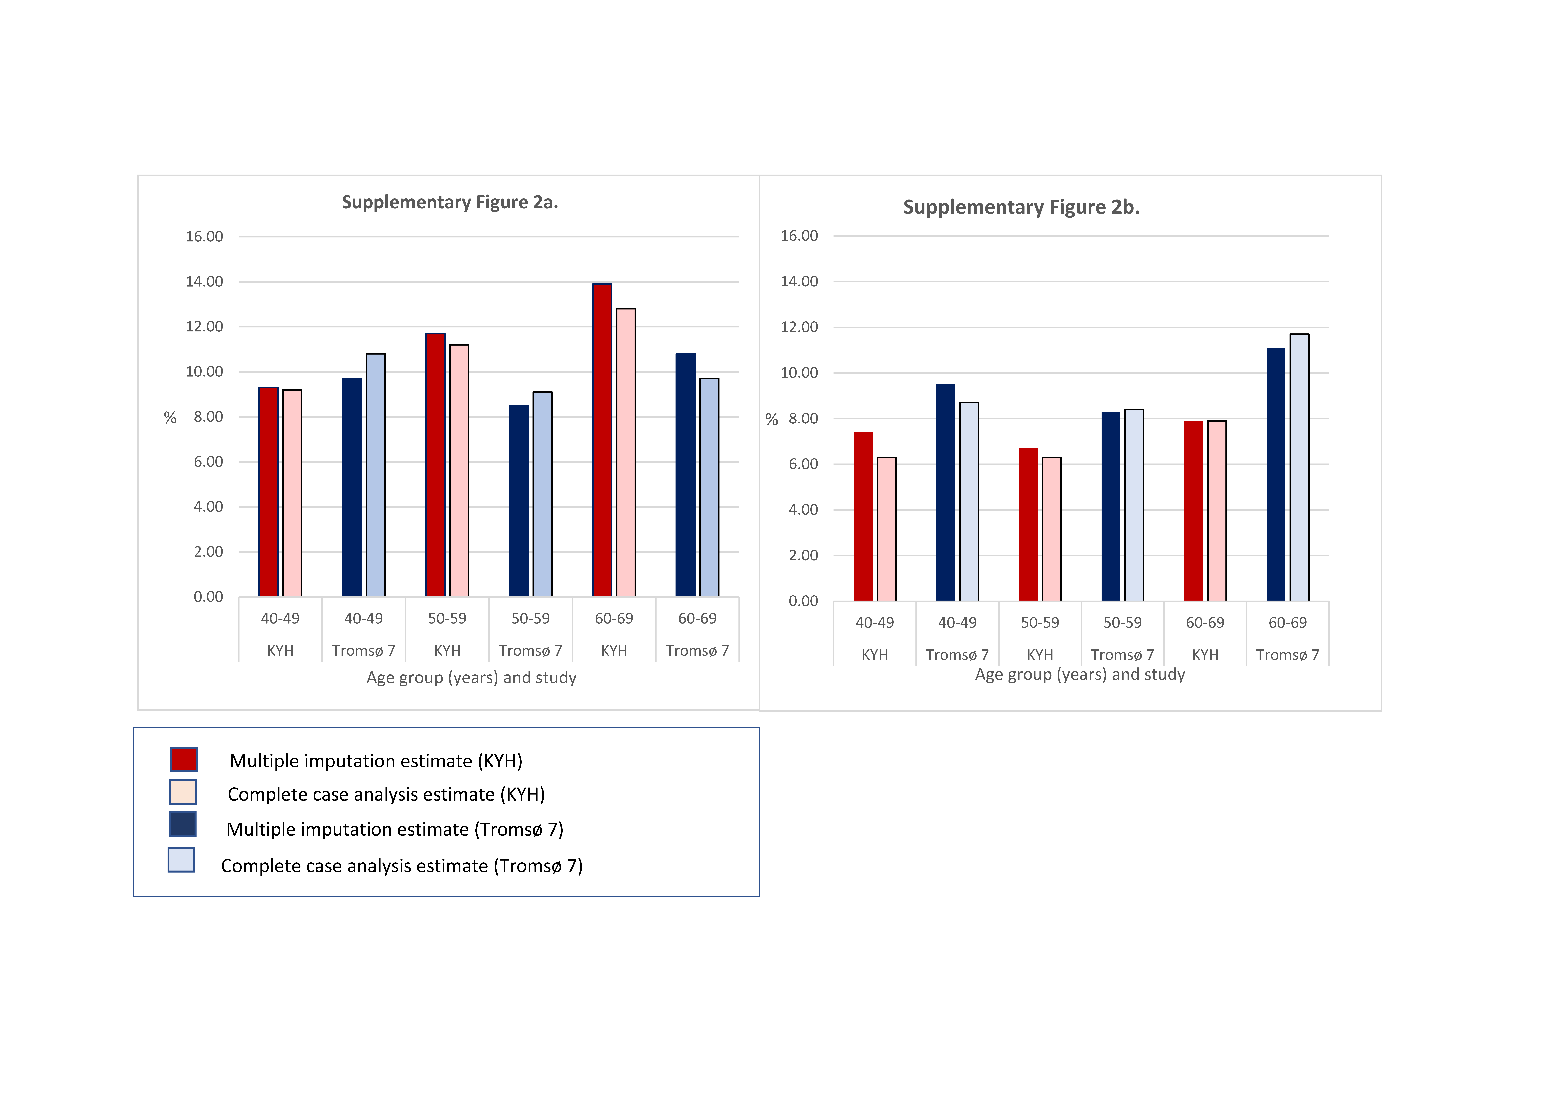
**

**Supplementary Figures 2a and 2b: Comparison of prevalence of obstructive lung function by age and study estimated using multiple imputation and complete case analysis in men and women**

Supplementary Figure 2a. Prevalence of obstructive lung function by age and study in men

Supplementary Figure 2b. Prevalence of obstructive lung function by age and study in women

**Supplementary Table 1. Association between Obstructive lung disease with respiratory symptoms (cough and breathlessness) and sex, age, education and smoking by study (ages 40-69). Know Your Heart study 2015-2018 and Tromsø Study 2015-2016.**

|  | | KYH | | | | | Tromsø 7 | | | | | Odds ratio for study KYH/Tromsø 7 adjusted for age and sex | Interaction by study adjusted for age and sex |
| --- | --- | --- | --- | --- | --- | --- | --- | --- | --- | --- | --- | --- | --- |
| Prevalence  n/N (%) | | | Odds ratio age, sex and city adjusted association with risk factor  (95% CI) | | Prevalence  n/N (%) | | | Odds ratio age and sex adjusted association with risk factor  (95% CI) | |
| Total | | 71/1844 | | (3.9) | - | - | 76/5144 | | (1.5) | - | - | 3.01 (2.16, 4.23) |  |
| Sex | Men | 37/770 | | (4.8) | 1.00 | (ref) | 42/2347 | | (1.8) | 1.00 | (ref) | 2.94 (1.86, 4.66) | P=0.90 |
| Women | 34/1074 | | (3.2) | 0.65 | (0.40, 1.04) | 34/2797 | | (1.2) | 0.69 | (0.44, 1.08) | 3.11 (1.90, 5.08) |
| Age, years | 40-49 | 14/559 | | (2.5) | 1.00 | (ref) | 8/1015 | | (0.8) | 1.00 | (ref) | 3.31 (1.38, 7.95) | P=0.24 |
| 50-59 | 28/629 | | (4.5) | 1.82 | (0.95, 3.50) | 12/1224 | | (1.0) | 1.27 | (0.52, 3.11) | 4.80 (2.42, 9.53) |
| 60-69 | 29/656 | | (4.4) | 1.79 | (0.93, 3.42) | 56/2905 | | (1.9) | 2.47 | (1.17, 5.20) | 2.37 (1.50, 3.74) |
| Test for trend |  | |  | P=0.10 | |  | |  | P=0.005 |  |  |
| Education | Lower | 9/117 | | (7.7) | 1.82 | (0.85, 3.91) | 36/1170 | | (3.1) | 2.07 | (1.20, 3.59) | 2.65 (1.24, 5.70) | P=0.44 |
| Middle | 40/968 | | (4.1) | 1.00 | (ref) | 21/1483 | | (1.4) | 1.00 | (ref) | 3.34 (1.93, 5.77) |
| Higher | 22/759 | | (2.9) | 0.72 | (0.42, 1.22) | 16/2437 | | (0.7) | 0.48 | (0.25, 0.92) | 4.81 (2.48, 9.34) |
| Test for trend |  | |  | P=0.04 | |  | |  | P<0.001 | |  |
| Smoking status | Never | 16/943 | | (1.7) | 1.00 | (ref) | 5/1800 | | (0.3) | 1.00 | (ref) | 5.45 (1.94, 15.30) | P=0.10 |
| Ex-smoker | 12/451 | | (2.7) | 1.71 | (0.78, 3.76) | 30/2563 | | (1.2) | 3.92 | (1.52, 10.15) | 2.39 (1.18, 4.85) |
| Current smoker | 43/450 | | (9.6) | 6.78 | (3.61, 12.74) | 41/764 | | (5.4) | 19.68 | (7.74, 50.04) | 2.01 (1.26, 3.22) |
| Smoking Pack years | Never smoked | 16/943 | | (1.7) | 1.00 | (ref) | 5/1800 | | (0.3) | 1.00 | (ref) | 5.45 (1.94, 15.30) | P=0.02 |
| >0<10 | 8/264 | | (3.0) | 2.03 | (0.85, 4.84) | 5/1491 | | (0.3) | 1.19 | (0.34, 4.13) | 11.34 (3.38, 38.11) |
| 10-19 | 9/157 | | (5.7) | 5.61 | (2.30, 13.65) | 17/898 | | (1.9) | 6.75 | (2.48, 18.37) | 4.17 (1.69, 10.29) |
| 20-29 | 13/200 | | (6.5) | 6.20 | (2.70, 14.21) | 21/464 | | (4.5) | 16.13 | (6.02. 43.23) | 1.84 (0.80, 4.23) |
| 30-39 | 9/120 | | (7.5) | 7.50 | (2.90, 19.39) | 16/250 | | (6.4) | 22.77 | (8.15, 63.66) | 1.28 (0.53, 3.11) |
| 40+ | 15/98 | | (15.3) | 17.70 | (7.40, 42.35) | 12/131 | | (9.2) | 32.64 | (11.11, 95.91) | 1.10 (0.44, 2.75) |
| Test for trend |  |  | | P<0.001 | |  |  | | P<0.001 | |  |  |
| Body mass index. kg/m2 | <18.5 | 2/21 | (9.5) | | 2.59 (0.56, 11.96) | | 2/31 | (6.5) | | 4.68 (1.05, 20.92) | | 1.10 (0.06, 19.52) | P=0.96 |
| 18.5-24.9 | 22/525 | (4.2) | | 1.00 (ref) | | 27/1672 | (1.6) | | 1.00 (ref) | | 3.73 (2.04, 6.84) |
| 25-29.9 | 24/693 | (3.5) | | 0.72 (0.40, 1.31) | | 28/2267 | (1.2) | | 0.67 (0.39, 1.14) | | 3.18 (1.81, 5.60) |
| 30-34.5 | 14/420 | (3.3) | | 0.71 (0.36, 1.42) | | 14/887 | (1.6) | | 0.86 (0.45, 1.66) | | 2.31 (1.07, 5.02) |
| >35 | 8/183 | (4.4) | | 1.01 (0.43, 2.34) | | 5/280 | (1.8) | | 1.09 (0.41, 2.86) | | 3.01 (0.92, 9.89) |
| Test for trend |  |  | | P=0.46 | |  |  | | P=0.53 | |  |
| Self-reported CVD morbidity | No | 62/1677 | (3.7) | | 1.00 (ref) | | 66/4734 | (1.4) | | 1.00 (ref) | | 3.13 (2.18, 4.50) | P=0.84 |
| Yes | 9/161 | (5.6) | | 1.27 (0.61, 2.65) | | 6/258 | (2.3) | | 1.33 (0.56, 3.13) | | 2.48 (0.83, 7.35) |

**Supplementary Table 2: Effect modification between age and pack year history by study and outcome**

|  | | Tromsø 7: Obstructive Lung Function* | | | KYH: Obstructive Lung Function + 1 or more respiratory symptoms** | | |
| --- | --- | --- | --- | --- | --- | --- | --- |
|  | Age | 40-49  (n=1008) | 50-59  (n=1211) | 60-69  (n=2858) | 40-49  (n=530) | 50-59  (N=610) | 60-69  (n=642) |
| Pack year history | Never smoked | 1.00 (ref) | 1.00 (ref) | 1.00 (ref) | 1.00 (ref) | 1.00 (ref) | 1.00 (ref) |
| >0<10 | 1.56 (0.95, 2.58) | 1.20 (0.62, 2.33) | 1.45 (0.95, 2.21) | 2.63 (0.74, 9.31) | 2.26 (0.84, 6.13) | 1.97 (0.74, 5.16) |
| 10-19 | 1.24 (0.66, 2.34) | 3.18 (1.72, 5.90) | 3.83 (2.58, 5.70) | 3.93 (1.07, 14.40) | 1.98 (0.23, 16.80) | 2.96 (1.09, 8.02) |
| 20-29 | 2.83 (1.34, 5.97) | 3.88 (1.87, 8.04) | 5.85 (3.85, 8.87) | 13.68 (3.83, 48.86) | 5.91 (2.20, 15.85) | 1.56 (0.46, 5.27) |
| 30-39 | 2.00 (0.43, 9.35) | 7.81 (3.54, 16.72) | 7.32 (4.56, 11.73) | 21.28 (4.01, 113.00) | 4.48 (0.84, 23.94) | 3.04 (1.20, 7.66) |
| 40+ | 2.91 (0.32, 26.95) | 11.44 (4.14, 31.64) | 8.10 (4.69, 13.97) | 32.15 (7.22, 143.09) | 25.56 (7.78, 83.94) | 1.33 (0.34, 5.18) |
|  | | Test for interaction p=0.055 | | | Test for interaction=0.014 | | |

*Model adjusted for sex

** Model adjusted for sex and city

**Supplementary Table 3. Characteristics of those with spirometry data compared to those without in total study population (all health check participants Know Your Heart, participants to visit 1 Tromsø 7).** **Know Your Heart study 2015-2018 and Tromsø Study 2015-2016.**

|  | | KYH | | | Tromsø 7 | | |
| --- | --- | --- | --- | --- | --- | --- | --- |
| Spirometry data | | P value for difference between those with and without spirometry data | Spirometry data | | P value for difference between those with and without spirometry data |
| n/N (%) | | n/N (%) | |
| Sex | Men | 787/1732 | (45.4) | P=0.78 | 2386/5217 | (28.6) | P=0.007 |
| Women | 1096/2389 | (45.9) | 2386/8346 | (30.4) |
| Site | Arkhangelsk | 943/2129 | (44.3) | P=0.06 | - |  | - |
| Novosibirsk | 940/1992 | (47.2) | - |  |
| Age, years | 40-44 | 278/577 | (48.2) | P=0.02  Test for trend p<0.001 | 478/3151 | (15.2) | P<0.001  Test for trend p<0.001 |
| 45-49 | 291/603 | (48.3) | 546/3281 | (16.6) |
| 50-54 | 313/660 | (47.4) | 549/3139 | (17.5) |
| 55-59 | 330/701 | (47.1) | 693/2896 | (23.9) |
| 60-64 | 344/770 | (44.7) | 1464/2740 | (53.4) |
| 65-69 | 327/810 | (40.4) | 1487/2439 | (61.0) |
| Education | Lower | 121/286 | (42.3) | P=0.19  Test for trend p=0.08 | 1197/3312 | (36.1) | P<0.001  Test for trend p<0.001 |
| Middle | 991/2203 | (45.0) | 1499/4942 | (30.3) |
| Higher | 771/1632 | (47.2) | 2463/9218 | (26.7) |
| Breathlessness  (MRC breathlessness scale*) | Grade 1 | 882/1885 | (46.8) | P=0.22  Test for trend P=0.05 | 3235/11080 | (29.2) | P=0.08  Test for trend=0.67 |
| Grade 2 | 618/1323 | (46.8) | 1750/5644 | (31.0) |
| Grade 3 | 278/641 | (43.5) | 52/172 | (30.2) |
| Grade 4 | 49/128 | (38.3) | - |  |
| Grade 5 | 33/76 | (43.4) | 130/470 | (27.7) |
| Chronic cough | No | 1075/2312 | (46.5) | P=0.29 | 4350/14587 | (29.8) | P=0.47 |
| Yes | 790/1762 | (44.8) | 809/2776 | (29.1) |
| Smoking status | Never | 961/2057 | (46.7) | P=0.46 | 1814/6640 | (27.3) | P<0.001 |
| Ex-smoker | 458/1031 | (44.4) | 2584/7868 | (32.8) |
| Current smoker | 462/1018 | (45.4) | 774/2847 | (27.2) |
| Pack year history | 0 | 961/2057 | (46.7) | P=0.71  Test for trend P=0.20 | 1814/6640 | (27.3) | P<0.001  Test for trend p<0.001 |
| <10 | 269/589 | (45.7) | 1504/4994 | (30.1) |
| 10-19 | 158/360 | (43.9) | 911/3010 | (30.3) |
| 20-29 | 208/443 | (47.0) | 466/1379 | (33.8) |
| 30-39 | 123/282 | (43.6) | 250/690 | (36.2) |
| >40 | 98/230 | (42.6) | 132/364 | (36.3) |
| Body mass index, kg/m2 | <18.5 | 22/45 | (48.9) | P=0.19  Test for trend p=0.06 | 31/88 | (35.2) | P=0.09  Test for trend p=0.10 |
| 18.5-24.9 | 535/1143 | (46.8) | 1691/5832 | (29.5) |
| 25-29.9 | 710/1536 | (46.2) | 2302/7600 | (30.3) |
| 30-34.5 | 425/917 | (46.4) | 901/3123 | (28.9) |
| >35 | 188/465 | (40.4) | 284/1061 | (26.8) |
| Self-reported CVD Morbidity | No | 1710/3718 | (46.0) | P=0.27 | 4799/16506 | (29.1) | P<0.001 |
| Yes | 167/388 | (43.0) | 264/660 | (40.0) |
| Total | | 1883/4121 | (45.7) |  | 5217/17646 | (29.6) |  |

*The standard MRC breathlessness questions as used in main analyses were asked at visit 2 Tromsø 7 but closely related questions on breathlessness were included at visit 1 for all participants and are used here as a proxy to investigate in breathlessness is related to missingness.
